# Supplementary material for: Maize Inbreds Exhibit High Levels of Copy Number Variation (CNV) and Presence/Absence Variation (PAV) in Genome Content
Source: PLoS Genet. 2009 Nov 20;5(11):e1000734. doi: 10.1371/journal.pgen.1000734 (PMC2780416; doi:10.1371/journal.pgen.1000734)
Supplement: Table S3 — Number of genes included within CNV and PAV segments. (0.03 MB XLS) [file pgen.1000734.s016.xls]

## Sheet: Supp T3
Table S3. Number of genes included within CNV and PAV segments
	All segments							Stringent segments1
	>20% coverage		>50% coverage		>80% coverage			>20% coverage		>50% coverage		>80% coverage
Class	Genes2	% no paralog3	Genes2	% no paralog3	Genes2	% no paralog3		Genes2	% no paralog3	Genes2	% no paralog3	Genes2	% no paralog3
B73>Mo17_PAV	473	0.368966	325	0.332454	246	0.283088		298	0.348901	232	0.34296	180	0.285714
B73>Mo17_Int.	797	0.37004	604	0.346049	502	0.332776		528	0.35277	437	0.352087	360	0.325275
B73>Mo17_CNV	115	0.398649	77	0.27381	59	0.186441		69	0.382716	55	0.267857	41	0.219512
B73≈Mo17_SNP	11492	0.419908	11184	0.419893	10783	0.419666		11161	0.421046	10901	0.420848	10491	0.419793
B73≈Mo17_Int.	6457	0.42979	6249	0.428899	5968	0.426651		6217	0.431676	6042	0.431555	5748	0.428943
B73≈Mo17	8618	0.42752	8401	0.42692	8134	0.425552		8308	0.430315	8127	0.430167	7831	0.428876
Mo17>B73_CNV	227	0.301418	184	0.321101	140	0.308176		17	0.421053	13	0.5	9	0.454545
Unclassified	1607	0.369843	1538	0.371177	1467	0.366957		1492	0.372962	1436	0.374586	1364	0.370605
Sum B73>Mo17 classes	1385	0.379218	1006	0.317437	807	0.267435		895	0.361462	724	0.320968	581	0.276834
Sum all B73≈Mo17 classes	26567	0.425739	25834	0.425238	24885	0.423957		25686	0.427679	25070	0.427524	24070	0.425871
1The stringent segments only include segments with at least 2000bp, 10 probes and a 2 fold change for B73>Mo17 or Mo17>B73 classes.
2The number of genes refers to the number of filtered gene set genes that are 20%, 50% or 80% included within the segment sequence.
3The percent of genes with no paralog indicates the percent of the genes that do not have another gene within the full working set of genes that has a BLASTP value of <1e-15.
